# Supplementary material
Source: Springer Nature journal article supplement (https://www.springermedizin.de/resource/supplementary/12967_2012_1042_MOESM9_ESM.pdf/9573616)

| Dimensions           |                       |              | Gender   |     |          |     |
|----------------------|-----------------------|--------------|----------|-----|----------|-----|
|                      |                       |              | Female   |     | Male     |     |
|                      |                       |              | Measures |     | Measures |     |
| Analyte Generic Name | Assay                 | Kit Batch    | Mean     | N   | Mean     | N   |
| ENA78                | Human Luminex 51 plex | H51-1, 12-09 | 167.3    | 72  | 114.5    | 45  |
|                      |                       | H51-2, 12-10 | 201.6    | 728 | 128.9    | 548 |
| GMCSF                | Human Luminex 51 plex | H51-1, 12-09 | 313.7    | 72  | 224.9    | 45  |
|                      |                       | H51-2, 12-10 | 196.3    | 728 | 125.0    | 548 |
|                      | Human MSD 9 plex      | H9-2, 4-10   | 598.6    | 72  | 310.7    | 45  |
| LEPTIN               | Human Luminex 51 plex | H51-1, 12-09 | 5,199.9  | 72  | 2,672.4  | 45  |
|                      |                       | H51-2, 12-10 | 4,383.6  | 728 | 1,608.0  | 548 |
| PDGFBB               | Human Luminex 51 plex | H51-1, 12-09 | 1,029.5  | 72  | 1,224.7  | 45  |
|                      |                       | H51-2, 12-10 | 917.7    | 728 | 991.2    | 548 |

Filter: Sample Type=[person]

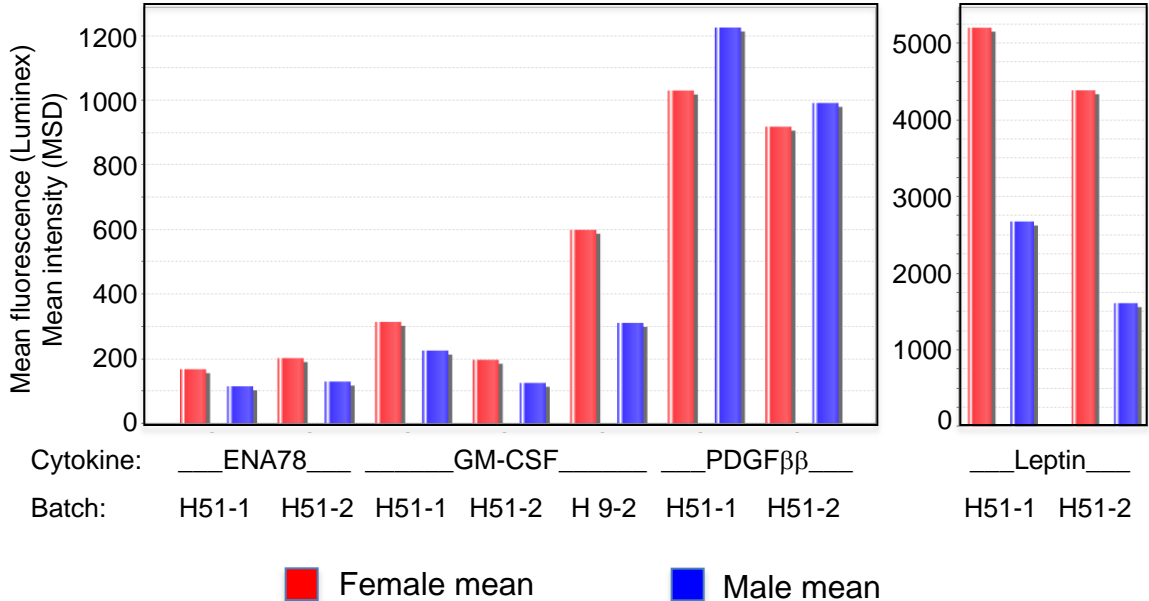

Supplement: MOESM9 [file 9573616]
